# Supplementary material
Source: HighWire-hosted journal article supplement (https://bmjopen.bmj.com/content/13/11/e074095)
Supplement: inline-supplementary-material-1 [file inline-supplementary-material-1.pdf]

| Topic                                                                                    | Sample questions                                                                                                                                                                      | Prompts/probes                                                                                                                                                                                                                        |
|------------------------------------------------------------------------------------------|---------------------------------------------------------------------------------------------------------------------------------------------------------------------------------------|---------------------------------------------------------------------------------------------------------------------------------------------------------------------------------------------------------------------------------------|
| Overall                                                                                  | <ul style="list-style-type: none"> <li>Overall, do share your experiences of being involved with our research?</li> </ul>                                                             |                                                                                                                                                                                                                                       |
| The approach and consent process                                                         | <ul style="list-style-type: none"> <li>Please talk me through how you got involved with the HipHelper research study?</li> <li>How clearly was the study explained to you?</li> </ul> | <ul style="list-style-type: none"> <li>Could we have dealt with that differently?</li> <li>How was this different to what you expected?</li> <li>For the future, what could we improve about the description of the study?</li> </ul> |
| Willingness to be randomised to either group/<br>participant views of their intervention | <ul style="list-style-type: none"> <li>Please talk me through what study treatment you received</li> </ul>                                                                            | <ul style="list-style-type: none"> <li><i>If required: clarify what HIP HELPER was and what was usual care/non-study intervention</i></li> <li>You were allocated to X group. What did that feel like?</li> </ul>                     |
| The risk of intervention contamination between the groups                                | <ul style="list-style-type: none"> <li>How much did talk to any other patients or caregivers (whilst in hospital) about the intervention?</li> </ul>                                  | <ul style="list-style-type: none"> <li>What discussions were had between those who received it and did not receive it?</li> </ul>                                                                                                     |
| <b>Both groups</b>                                                                       |                                                                                                                                                                                       |                                                                                                                                                                                                                                       |
| The acceptability of the inpatient care                                                  | <ul style="list-style-type: none"> <li>Please talk me through your treatment while you were in the hospital</li> </ul>                                                                | <ul style="list-style-type: none"> <li>What aspects of your care that were lacking in the hospital?</li> <li>Can you remember which wards you were on? Can you remember being moved to different areas of the hospital?</li> </ul>    |

| Topic                                                              | Sample questions                                                                                                                                                                                                                                                                                                                    | Prompts/probes                                                                                                                                                                                                                                                                                                                                                                                                                                                                                                                                                                                                                                                                                                                                                                                                                            |
|--------------------------------------------------------------------|-------------------------------------------------------------------------------------------------------------------------------------------------------------------------------------------------------------------------------------------------------------------------------------------------------------------------------------|-------------------------------------------------------------------------------------------------------------------------------------------------------------------------------------------------------------------------------------------------------------------------------------------------------------------------------------------------------------------------------------------------------------------------------------------------------------------------------------------------------------------------------------------------------------------------------------------------------------------------------------------------------------------------------------------------------------------------------------------------------------------------------------------------------------------------------------------|
|                                                                    | <ul style="list-style-type: none"> <li>(Carers) As X's carer, what was your impression of the care?</li> </ul>                                                                                                                                                                                                                      | <ul style="list-style-type: none"> <li>For both of you, what was helpful and less helpful to your care?</li> </ul>                                                                                                                                                                                                                                                                                                                                                                                                                                                                                                                                                                                                                                                                                                                        |
| <b>Intervention group only</b>                                     |                                                                                                                                                                                                                                                                                                                                     |                                                                                                                                                                                                                                                                                                                                                                                                                                                                                                                                                                                                                                                                                                                                                                                                                                           |
| <p>In-patient HIP HELPER programme</p> <p>Strengths/weaknesses</p> | <ul style="list-style-type: none"> <li>How did you find the HIP HELPER programme?</li> <li>Please tell me what you remember about the manual handling training you had in the hospital?</li> <li>Please tell me about the phone calls you received?</li> <li>What were the individualised goals you set in the hospital?</li> </ul> | <ul style="list-style-type: none"> <li>Please share any specific examples of what you can remember from the programme?</li> <li>What were the most helpful bits of your HIP HELPER intervention?</li> <li>What was good about it?</li> <li>What were the less helpful/worse bits of the HIP HELPER intervention?</li> <li>For you as the patient/and you as X's carer?</li> <li>How did you get on with that at home?</li> <li>Was it helpful? If so, how?</li> <li>Can you remember what you talked about?</li> <li>Can you give specific examples of what was helpful?</li> <li>Was there any advice that confused you or you weren't clear about?</li> <li>How did you come up with these?</li> <li>(Carer) By how far were you involved in the goal setting process?</li> <li>In retrospect, what goal(s) would you alter?</li> </ul> |

| Topic                  | Sample questions                                                                                                                                                                                                                                                                     | Prompts/probes                                                                                                                                                                                                                                       |
|------------------------|--------------------------------------------------------------------------------------------------------------------------------------------------------------------------------------------------------------------------------------------------------------------------------------|------------------------------------------------------------------------------------------------------------------------------------------------------------------------------------------------------------------------------------------------------|
| <b>Both groups:</b>    |                                                                                                                                                                                                                                                                                      |                                                                                                                                                                                                                                                      |
| On return to your home | <ul style="list-style-type: none"> <li>• <i>(If required, state residential status)</i> Can you tell me who you live with at home?</li> </ul>                                                                                                                                        |                                                                                                                                                                                                                                                      |
|                        | <ul style="list-style-type: none"> <li>• What were the first things you wanted to achieve once at home?</li> <li>• How did you decide who was to be your allocated carer?</li> <li>• <i>(Carers)</i> Can you talk me through this decision to be designated as X's carer?</li> </ul> | <ul style="list-style-type: none"> <li>• On a 1-10 scale, how confident did you feel when you left the hospital?</li> <li>• Can you tell me why you have chosen that number on the scale?</li> </ul>                                                 |
|                        | <ul style="list-style-type: none"> <li>• <i>(Long-term carers)</i> Once at home, how do you feel care-giving role changed?</li> </ul>                                                                                                                                                | <ul style="list-style-type: none"> <li>• Can you tell me about any new caring responsibilities?</li> <li>• How did you organise these?</li> <li>• Did this change the dynamics in their relationship in taking on caring role, if so, how</li> </ul> |
|                        | <ul style="list-style-type: none"> <li>• What sort of adaptations did you make at home to enable you to move about independently (where possible)?</li> <li>• What do you think is lacking in the transition from hospital to home?</li> </ul>                                       | <ul style="list-style-type: none"> <li>• Are/were there any other things that may have affected your transfer home?</li> <li>• Are/were there any other things that required you to adapt the advice you were given?</li> </ul>                      |
|                        | <ul style="list-style-type: none"> <li>• How willing were/are you to continue with activities/advice that were suggested to you?</li> <li>• Once at home, by how far did you feel supported by the health care professions you had seen?</li> </ul>                                  | <i>Probes: transferring, dressing, activities of daily living</i>                                                                                                                                                                                    |

| Topic                                                                                                    | Sample questions                                                                                                                                                                                                                                                                                               | Prompts/probes                                                                                                                                                                                                                                                           |
|----------------------------------------------------------------------------------------------------------|----------------------------------------------------------------------------------------------------------------------------------------------------------------------------------------------------------------------------------------------------------------------------------------------------------------|--------------------------------------------------------------------------------------------------------------------------------------------------------------------------------------------------------------------------------------------------------------------------|
|                                                                                                          | <ul style="list-style-type: none"> <li>• (Carers) For you as caregiver, how did you get on with helping move X about?</li> <li>• Were there any adaptations that you made to the advice given?</li> </ul>                                                                                                      |                                                                                                                                                                                                                                                                          |
| What modifications they may recommend to interventions received                                          | <ul style="list-style-type: none"> <li>• What changes did you find easy to implement and what did you find harder?</li> </ul>                                                                                                                                                                                  | <ul style="list-style-type: none"> <li>• What could we improve?</li> </ul>                                                                                                                                                                                               |
|                                                                                                          | <ul style="list-style-type: none"> <li>• What do we need to modify for any future programmes to support people with a hip replacement and their carer to help you get up and moving and returning to normal life?</li> </ul>                                                                                   | <ul style="list-style-type: none"> <li>• Can you explain why? <i>Prompt around ADL's</i></li> </ul>                                                                                                                                                                      |
| The ease and convenience of the data collection processes/applicability of the methods and measures used | <ul style="list-style-type: none"> <li>• As you were part of a trial, we had to collect a lot of measurements. Can you talk me through what these were?</li> </ul>                                                                                                                                             | <p><i>Prompt:</i><br/><i>'Share screen' of the front page of questionnaires to help with memory recall.</i></p>                                                                                                                                                          |
|                                                                                                          | <ul style="list-style-type: none"> <li>• How did you manage with the questionnaires we gave you at the start of the study and at the end in the post?</li> <li>• What about your interview experience today?</li> </ul>                                                                                        | <ul style="list-style-type: none"> <li>• Were they easy to complete?</li> <li>• Do you remember them being a problem?</li> <li>• How convenient were they?</li> <li>• How did you find it?</li> <li>• Is there anything we can do to improve this experience?</li> </ul> |
| Summary and end                                                                                          | <ul style="list-style-type: none"> <li>• We are now ? months since your hip replacement, by how far do you think the HipHelper programme (or usual care) has helped with your recovery?</li> <li>• If we were to run this programme again in the future, is there anything else we should consider?</li> </ul> | <ul style="list-style-type: none"> <li>• How far do you think the Hip Helper programme (or usual care) has helped you achieve your goals?</li> </ul>                                                                                                                     |

| Topic | Sample questions                                                                                                                                                                                                                                                                                                                                                                                      | Prompts/probes |
|-------|-------------------------------------------------------------------------------------------------------------------------------------------------------------------------------------------------------------------------------------------------------------------------------------------------------------------------------------------------------------------------------------------------------|----------------|
|       | <ul style="list-style-type: none"><li>• How do you think we could better support you and your carer to recover after hip surgery?</li><li>• Is anything else you have gained by being involved in this research study</li><li>• Is there anything else we haven't thought of and that you can share with us to improve the study and the care of hip replacement patients and their carers?</li></ul> |                |
